# Supplementary material
Source: MDPI journal article supplement (https://www.mdpi.com/2039-4713/14/1/17)
Supplement: s1 [file s1]

## Supplementary Materials

**Table S1:** Summary of characterization results from the Dynamic Light Scattering (DLS) on hydrodynamic diameter (Zeta average) and surface charge (Zeta potential) for Fe<sub>3</sub>O<sub>4</sub> NM aqueous suspensions. PDI: polydispersity index.

| conc.<br>(mg/L) | Hydrodynamic diameter | Surface charge |                  |
|-----------------|-----------------------|----------------|------------------|
|                 | Z-average (nm)        | PDI            | Z-potential (mV) |
| 3200            | 4550 ± 1003           | 0.4            | -13.9 ± 0.76     |
| 1000            | 6144 ± 915.5          | 0.9            | -12.1 ± 0.51     |
| 500             | 5203 ± 423.6          | 0.8            | -13.7 ± 1.62     |
| 200             | 5582 ± 1637           | 0.7            | -22.1 ± 0.45     |
| 100             | 3985 ± 941.9          | 1.0            | -29.2 ± 2.57     |

**Table S2:** OH Radicals formation by means of NBM Fe<sub>3</sub>O<sub>4</sub> PEG-PLGA. LOD: limit of detection.

| Sample                                  | 2.5 DBHA | Time<br>(h) | 2.5 DBHA                                 | OH·                                      |
|-----------------------------------------|----------|-------------|------------------------------------------|------------------------------------------|
|                                         | (nM)     |             | production rate<br>(nM h <sup>-1</sup> ) | production rate<br>(nM h <sup>-1</sup> ) |
| Blank                                   | <LOD     | 24          | <LOD                                     | <LOD                                     |
| Fe <sub>3</sub> O <sub>4</sub> PEG-PLGA | 139      | 24          | 5.8                                      | 21                                       |

**Table S3:** Soil pH (1:5 soil: 0.01M CaCl<sub>2</sub>) as measured over the toxicity tests performed with *Enchytraeus crypticus*.

| NM                                      | Conc. (mg Fe/kg soil) | Time (days) |     |     |
|-----------------------------------------|-----------------------|-------------|-----|-----|
|                                         |                       | 0           | 28  | 56  |
| Fe <sub>3</sub> O <sub>4</sub>          | 0                     | 5.3         | 5.6 | 5.2 |
|                                         | 100                   | 5.4         | 5.6 | 5.0 |
|                                         | 200                   | 5.4         | 5.5 | 5.0 |
|                                         | 500                   | 5.4         | 5.5 | 4.9 |
|                                         | 1000                  | 5.4         | 5.5 | 4.9 |
|                                         | 3200                  | 5.4         | 5.5 | 5   |
| Fe <sub>3</sub> O <sub>4</sub> PEG-PLGA | 0                     | 5.3         | 5.4 | 4.5 |
|                                         | 0-disp                | 5.2         | 5.0 | 4.5 |
|                                         | 10                    | 5.2         | 5.0 | 4.5 |
|                                         | 100                   | 5.2         | 5.1 | 4.5 |
|                                         | 200                   | 5.4         | 5.1 | 5.0 |
|                                         | 500                   | 5.4         | 5.0 | 5.1 |

**Table S4:** Soil pH (1:5 soil: 0.01M CaCl<sub>2</sub>) as measured over the toxicity tests performed with *Folsomia candida*.

| NM                                      | Conc. (mg Fe/kg soil) | Time (days) |     |     |
|-----------------------------------------|-----------------------|-------------|-----|-----|
|                                         |                       | 0           | 28  | 56  |
| Fe <sub>3</sub> O <sub>4</sub>          | 0                     | 5.1         | 5.5 | 5.6 |
|                                         | 100                   | 4.9         | 5.5 | 5.3 |
|                                         | 200                   | 4.8         | 5.4 | 4.8 |
|                                         | 500                   | 4.8         | 5.4 | 4.7 |
|                                         | 1000                  | 4.9         | 5.2 | 5.2 |
|                                         | 3200                  | 4.9         | 5.4 | 4.9 |
| Fe <sub>3</sub> O <sub>4</sub> PEG-PLGA | 0                     | 5.1         | 5.2 | 4.4 |
|                                         | 0-disp                | 5.1         | 5.1 | 4.4 |
|                                         | 10                    | 5.1         | 5.1 | 4.4 |
|                                         | 100                   | 5.1         | 5.0 | 4.4 |
|                                         | 200                   | 5.0         | 5.1 | 4.4 |
|                                         | 500                   | 4.7         | 5.2 | 4.5 |

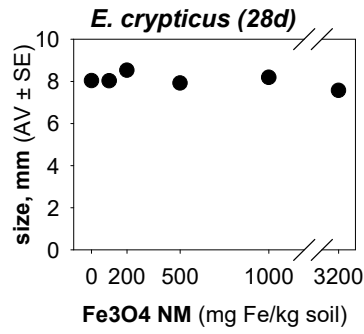

**Figure S1:** Results in terms of size for *Enchytraeus crypticus* exposed to Fe<sub>3</sub>O<sub>4</sub> NM for 28 days, in LUFA 2.2 soil. Values are expressed as average ± standard error (AV ± SE).

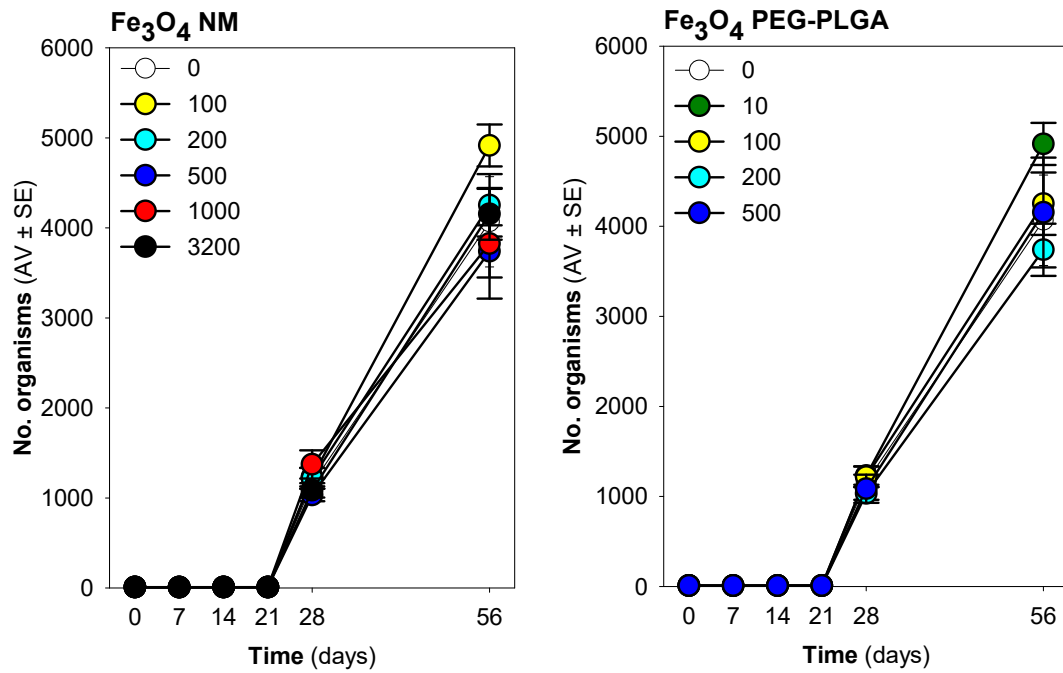

**Figure S2:** Results in terms of number of animals (adults + juveniles) when exposing *Enchytraeus crypticus* in LUFA 2.2 soil to Fe<sub>3</sub>O<sub>4</sub> NM and Fe<sub>3</sub>O<sub>4</sub> PEG-PLGA over time, at days: 7, 14, 21, 28 and 56. Values represent population as average ± standard error (AV ± SE).

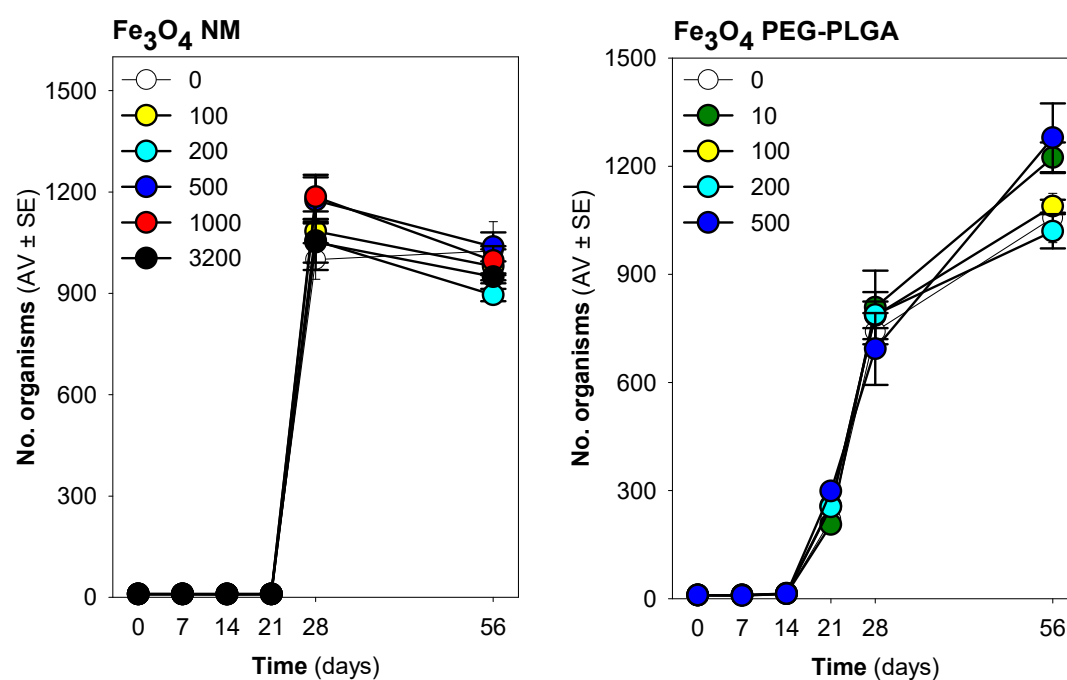

**Figure S3:** Results in terms of number of animals (adults + juveniles) when exposing *Folsomia candida* in LUFA 2.2 soil to Fe<sub>3</sub>O<sub>4</sub> NM and Fe<sub>3</sub>O<sub>4</sub> PEG-PLGA over time, at days: 7, 14, 21, 28 and 56. Values represent population as average ± standard error (AV ± SE).
